# Supplementary material for: 1D transition-metal dichalcogenides/carbon core–shell composites for the hydrogen evolution reaction
Source: Royal Society of Chemistry journal article supplement (doi:10.1039/d3ta04416e), 2023-01-01
Supplement: d3ta04416e1.pdf [file d3ta04416e1.pdf]

# 1D transition-metal dichalcogenides/carbon core-shell composites for Hydrogen Evolution Reaction

Asmita Dutta<sup>1</sup>, Ortal Breuer<sup>2</sup>, Manjunath Krishnappa<sup>3</sup>, Refael Minnes<sup>4</sup>, Alla Zak<sup>3</sup>, Arie Borenstein<sup>1</sup>

1- Department of Chemical Sciences, Ariel University, Israel

2- Department of Chemistry, Bar-Ilan University, Israel

3- Faculty of Sciences, Holon Institute of Technology, Israel

4- Department of Physics, Ariel University, Israel

\*- Corresponding author. Email: arieb@ariel.ac.il

## Table of Contents

### Tables

|          |                                                                           |   |
|----------|---------------------------------------------------------------------------|---|
| Table S1 | XPS Peak Table of different elements                                      | 2 |
| Table S2 | XPS % calculation of tungsten                                             | 2 |
| Table S3 | Comparison of electrochemical performances<br>of similar electrocatalysts | 3 |
| Table S4 | Values of EIS spectra in 0.5 M H <sub>2</sub> SO <sub>4</sub>             | 4 |

### Figures

|            |                                                                                  |    |
|------------|----------------------------------------------------------------------------------|----|
| Figure S1  | Low magnification STEM image                                                     | 5  |
| Figure S2  | EDS of the carbon-coated WS <sub>2</sub> tube                                    | 5  |
| Figure S3  | Percentage analysis of XRD spectrum                                              | 6  |
| Figure S4  | Absolute absorption spectra                                                      | 6  |
| Figure S5  | Raman spectroscopy of the WS <sub>2</sub> /C composites                          | 7  |
| Figure S6  | Full XPS spectrum of the WS <sub>2</sub> /C composites                           | 7  |
| Figure S7  | XPS of S2p and N1s for of the WS <sub>2</sub> /C composites                      | 8  |
| Figure S8  | XPS of pristine WS <sub>2</sub> Peak splitting of W4f and C1s                    | 8  |
| Figure S9  | MS results of chronoamperometry                                                  | 9  |
| Figure S9  | LSVs of the Toray carbon paper                                                   | 9  |
| Figure S10 | CVs of the WS <sub>2</sub> /C composites in 0.5 M H <sub>2</sub> SO <sub>4</sub> | 10 |
| Figure S11 | O-WS <sub>2</sub> /C at acidic and neutral solutions.                            | 10 |
| Figure S12 | A-WS <sub>2</sub> /C at acidic and neutral solutions.                            | 11 |
| Figure S13 | Tafel slope in different pH solutions                                            | 11 |
| Figure S14 | CV before and after the 12 h of chronoamperometry                                | 12 |

## Tables

**Table S1:** XPS Peak table for all the carbon-coated samples along with pristine WS<sub>2</sub>.

| Samples        | WS <sub>2</sub> | A-WS <sub>2</sub> /C | O-WS <sub>2</sub> /C | R-WS <sub>2</sub> /C |
|----------------|-----------------|----------------------|----------------------|----------------------|
| Carbon         | 33.18           | 40.21                | 41.74                | 31.85                |
| C-C            | 22.48           | 33.64                | 26.15                | 15.85                |
| C-O            | 9.35            | 4.84                 | 12.52                | 13.55                |
| C=O            | 2.19            | 1.88                 | 3.86                 | 2.01                 |
| Oxygen (O1s)   | 14.64           | 5.49                 | 9.01                 | 21.65                |
| Sulphur (s2p)  | 11.41           | 7.04                 | 2.87                 | 6.84                 |
| Tungsten (W4f) | 4.82            | 3.32                 | 1.79                 | 4.77                 |
| Nitrogen (N1s) | 2.46            | 3.58                 | 2.07                 | 3.5                  |

**Table S2:** Atomic % of WS<sub>2</sub> (4f<sub>7/2</sub>+4f<sub>5/2</sub>) and WO<sub>3</sub> (4f<sub>7/2</sub>+4f<sub>5/2</sub>) content in the catalysts compared with total atomic % of W, obtained in XPS.

| Samples              | Atomic % of WS <sub>2</sub> or<br>WO <sub>2</sub><br>(4f <sub>7/2</sub> +4f <sub>5/2</sub> )/W | Atomic % of WO <sub>3</sub><br>(4f <sub>7/2</sub> +4f <sub>5/2</sub> )/W | Total atomic % of<br>W |
|----------------------|------------------------------------------------------------------------------------------------|--------------------------------------------------------------------------|------------------------|
| WS <sub>2</sub>      | 95                                                                                             | 0                                                                        | 7.67                   |
| A-WS <sub>2</sub> /C | 89                                                                                             | 0                                                                        | 3.17                   |
| O-WS <sub>2</sub> /C | 53.73                                                                                          | 44.17                                                                    | 3.35                   |
| R-WS <sub>2</sub> /C | 35.61                                                                                          | 61.75                                                                    | 8.76                   |

**Table S3:** Comparison of electrochemical performances of similar electrocatalysts

| Catalysts                                                                            | Current density, mA cm <sup>-2</sup> | Overpotential (mV vs. RHE) | Journal, Year of Publication                   | Ref.      |
|--------------------------------------------------------------------------------------|--------------------------------------|----------------------------|------------------------------------------------|-----------|
| 2D graphene/WS <sub>2</sub> nanosheet                                                | 10                                   | 180                        | <i>ACS Appl. Energy Mater.</i> , 2021          | 42        |
| WS <sub>2</sub> /C                                                                   | 10                                   | 179                        | Journal of Fuel Chemistry and Technology, 2021 | 43        |
| WS <sub>2</sub> /OCF                                                                 | 10                                   | 278                        | Applied Surface Science, 2017                  | 44        |
| WS <sub>2</sub> /rGO                                                                 | 10                                   | 170                        | Nanoscale, 2015                                | 45        |
| hierarchical triple-shelled (WS <sub>2</sub> -C-WS <sub>2</sub> ) hollow nanospheres | 10                                   | 175                        | Journal of Material Chemistry A, 2018          | 46        |
| Carbon foam-N-doped Graphene-@ MoS <sub>2</sub>                                      | 10                                   | 170                        | Journal of Material Chemistry A, 2013          | 47        |
| N-enriched C foam@WS <sub>2</sub>                                                    | 10                                   | 153                        | Applied Surface Science, 2019                  | 48        |
| N,S doped graphene                                                                   | 10                                   | 390                        | Angewandte Chemie, 2014                        | 49        |
| N, P co-doped carbon-encapsulated CoP/MoP hybrid                                     | 10                                   | 183                        | Journal of Colloid and Interface Science, 2023 | 50        |
| WS <sub>2</sub> Nanoribbons                                                          | 10                                   | 225                        | Advanced Energy Materials, 2014                | 17        |
| MoS <sub>2</sub> -WS <sub>2</sub>                                                    | 10                                   | 129                        | <i>ACS Sustainable Chem. Eng.</i> , 2018       | 51        |
| R-WS <sub>2</sub> /C                                                                 | 10                                   | 172                        |                                                | This work |

**Table S4:** Values of resistances and capacitances from EIS spectra in 0.5 M H<sub>2</sub>SO<sub>4</sub>

|                      | $R_s$ (Ohm) | $R_1$ (Ohm) | $CPE_1(\mu F)$ |
|----------------------|-------------|-------------|----------------|
| WS <sub>2</sub>      | 3.48        | 56.7        | 6.25           |
| Carbon               | 2.71        | 9.01        | 8.08           |
| A-WS <sub>2</sub> /C | 4.13        | 13.77       | 242            |
| O-WS <sub>2</sub> /C | 2.78        | 11.21       | 7605           |
| R-WS <sub>2</sub> /C | 4.8         | 8.87        | 1642           |

The equivalent circuit contains a resistor ( $R_s$ ) connected with two parallel units in series: a constant phase element and a resistor ( $CPE_1-R_{ct}$ ). The  $R_s$  represents the solution resistance, and the  $CPE_1-R_{ct}$  pair is equivalent to resistor and capacitor in parallel combination related to the charge transfer.

## Figures

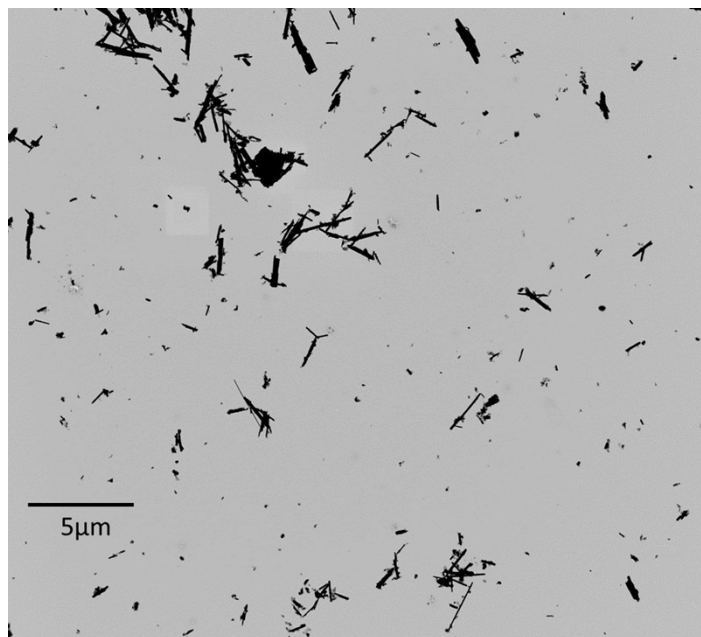

**Figure S1:** Low magnification STEM image of WS<sub>2</sub> NTs/carbon composite showing the NTs are well dispersed throughout the grid.

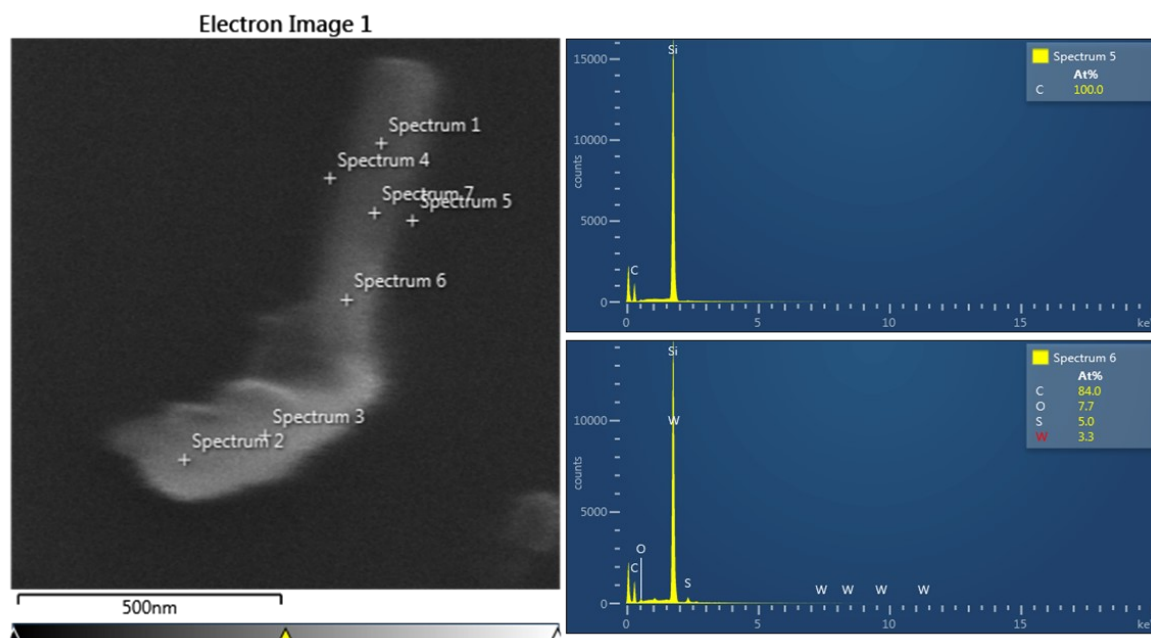

**Figure S2:** *left.* Low voltage SEM image of the carbon-coated WS<sub>2</sub> tube on silicon wafer. *Right.* EDS analysis of different points on the nanotube shown, revealing 100% carbon adjacent to the wall of the tube (point #5) as compared to elements content in the middle of the tube (point #6). The high content carbon proves that the carbon efficiently wraps all over the nanotube.

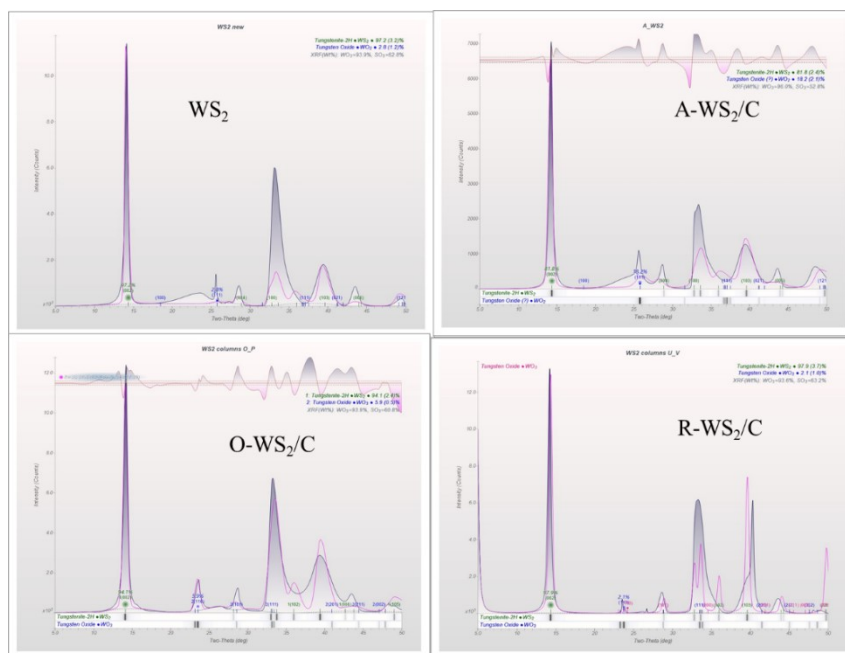

Figure S3. XRD analysis of three different samples with pristine WS<sub>2</sub> shows the presence of WO<sub>2</sub> oxide phase in pristine and first annealed (A-WS<sub>2</sub>/C) sample whereas the other two samples (O-WS<sub>2</sub>/C AND R-WS<sub>2</sub>/C) contain WO<sub>3</sub> phase. Importantly, for every sample WS<sub>2</sub> (002) peak at 2 $\theta$ =14.5 remains a higher percentage proving the unharmed crystallinity.

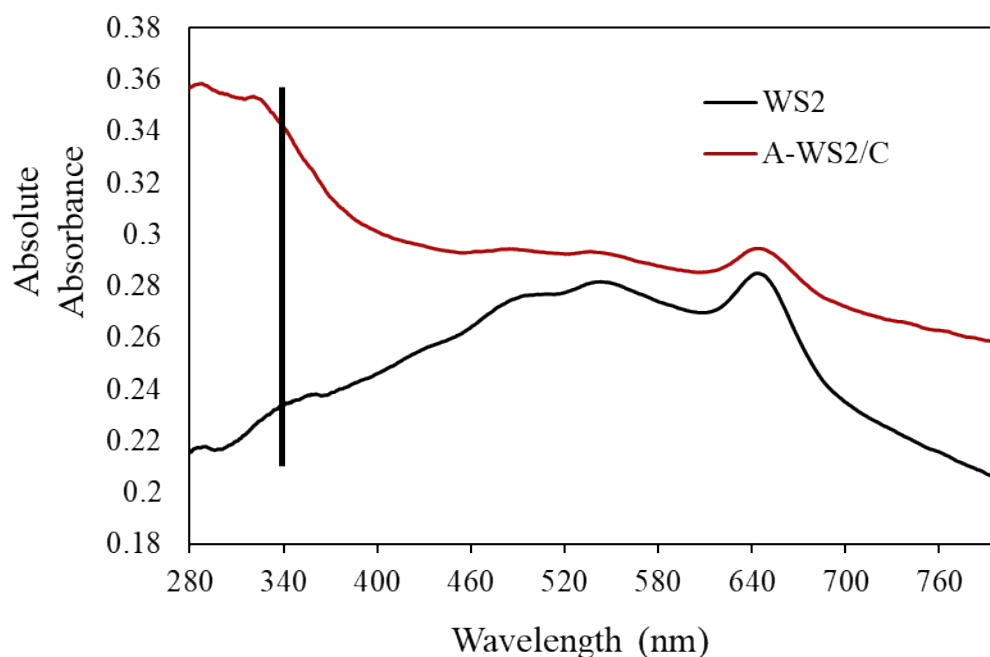

**Figure S4:** Absolute absorption spectra of prepared A-WS<sub>2</sub>/C showing no shift at the exciton of the nanotube. An additional peak near 340 nm appears due to the attachment of carbon with the nanotube.

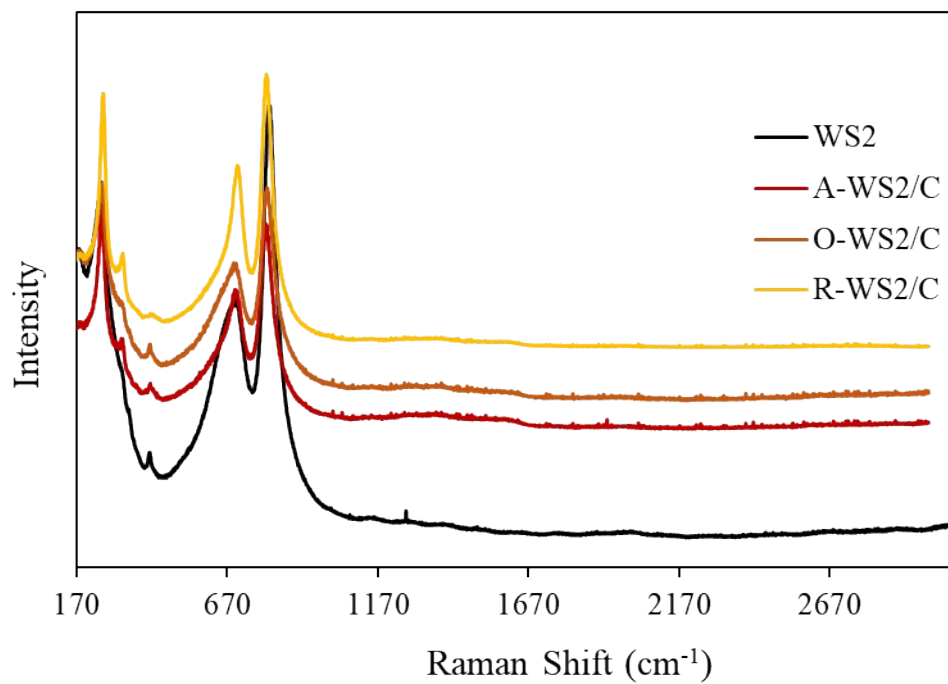

**Figure S5:** Raman spectroscopy of the WS<sub>2</sub>/C composites.

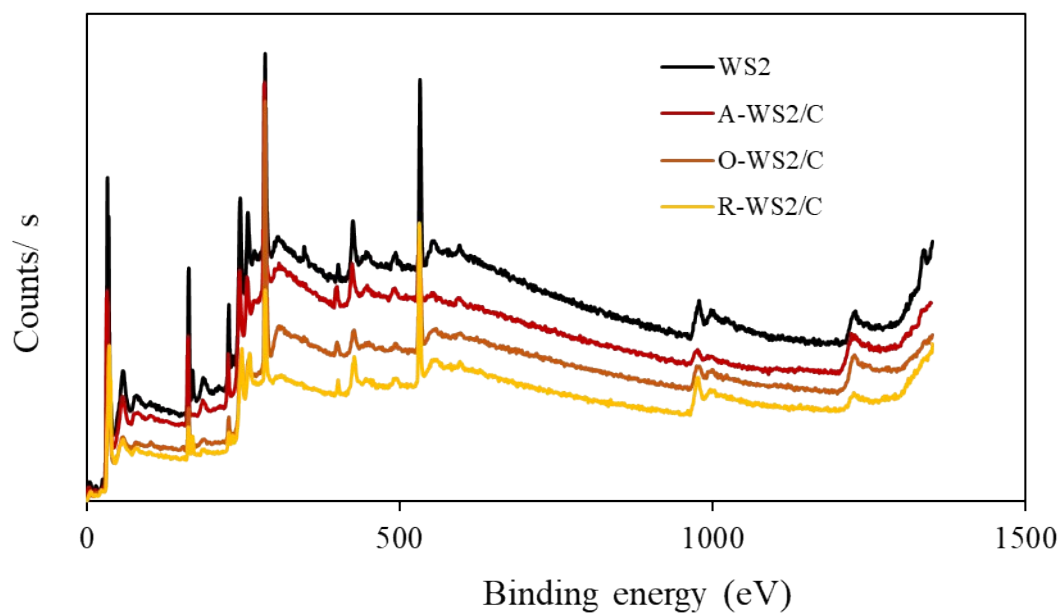

**Figure S6:** Full XPS spectrum of the WS<sub>2</sub>, A-WS<sub>2</sub>/C, O-WS<sub>2</sub>/C, R-WS<sub>2</sub>/C.

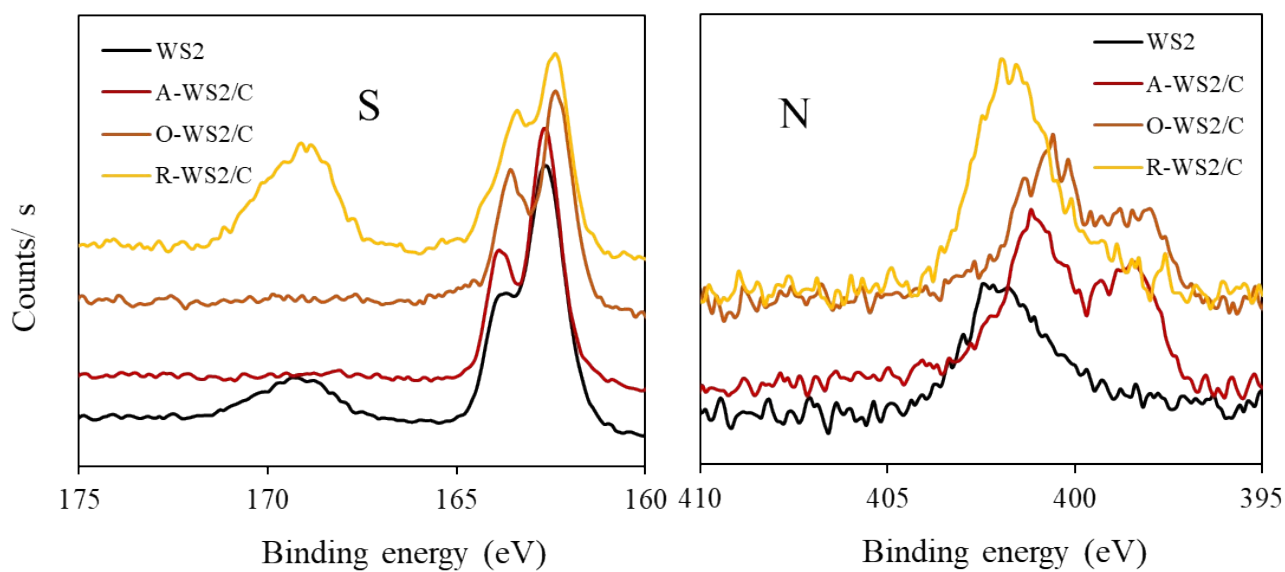

**Figure S7:** XPS of S2p and N1s for all samples.

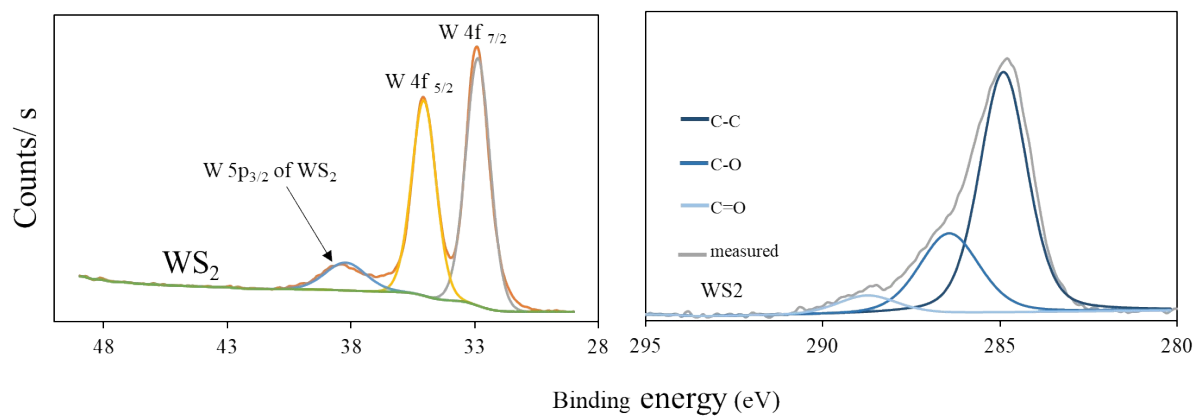

**Figure S8:** XPS spectrum of pristine WS2 after peak splitting of W4f and C1s scan.

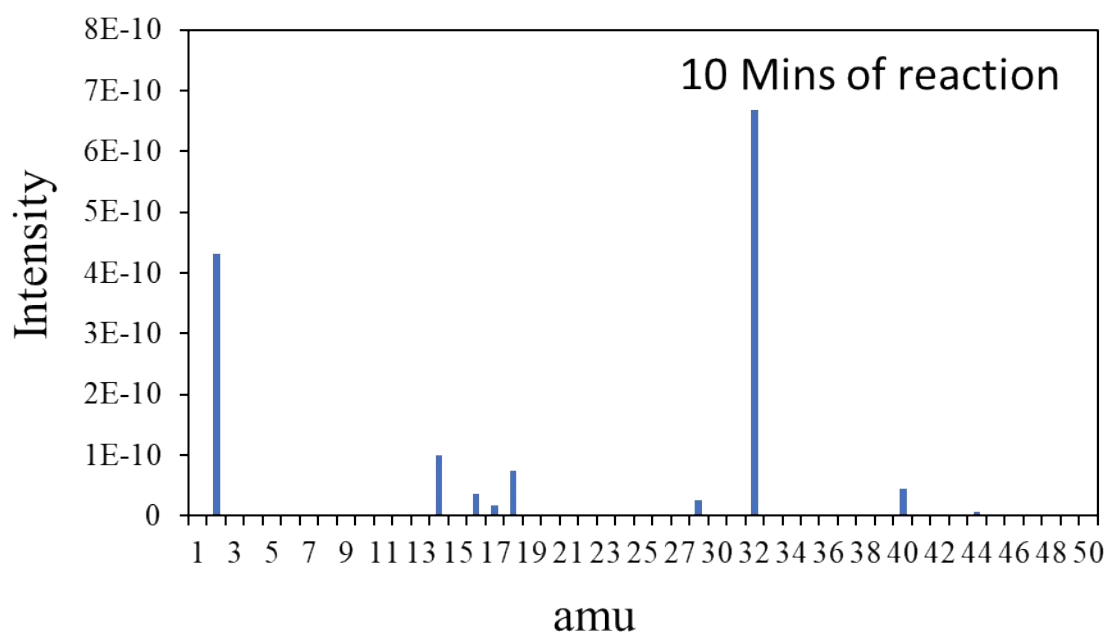

**Figure S9.** Mass spectroscopy (MS) was collected from A-WS2/C after 10 minutes of CA at its overpotential, confirming hydrogen production.

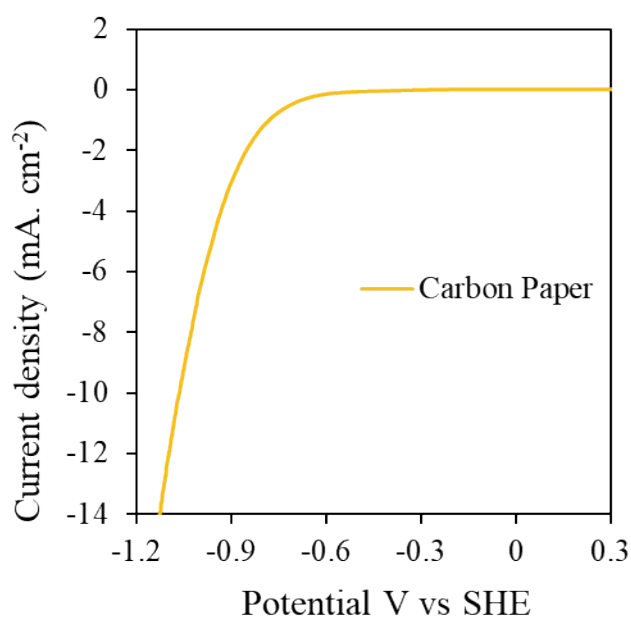

**Figure S10:** LSVs of the Toray carbon paper showing a negligible effect on the catalytic performance.

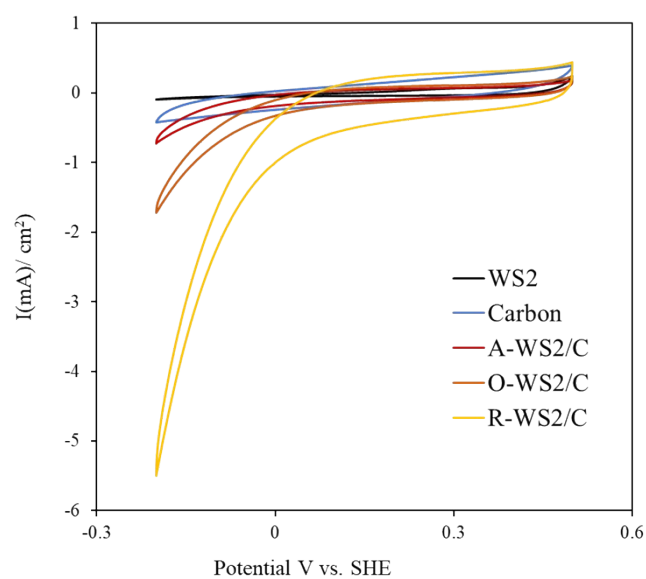

**Figure S11:** CV for all the samples in 0.5 M  $\text{H}_2\text{SO}_4$ .

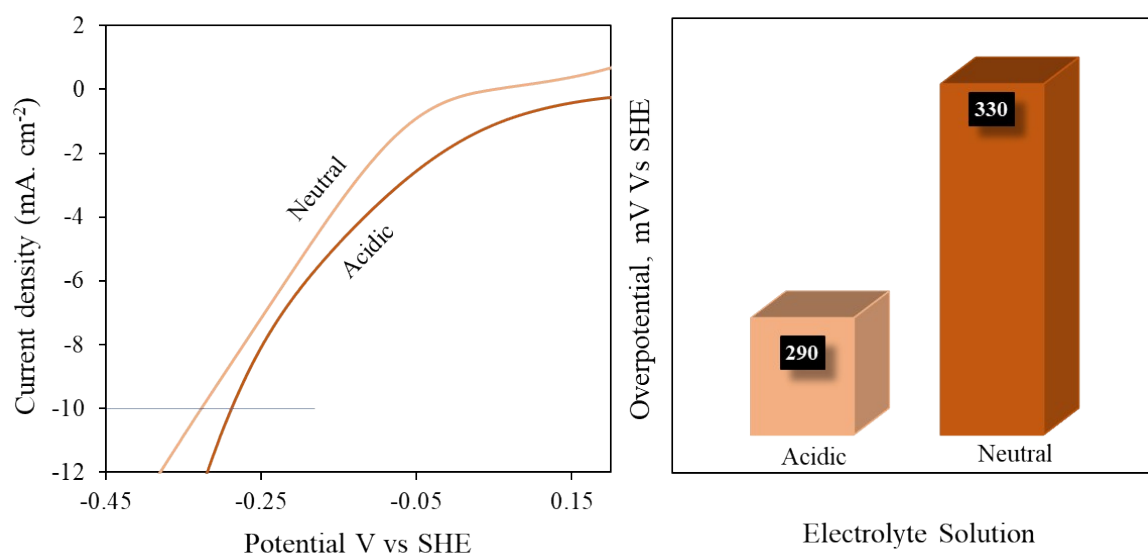

**Figure S12:** Onset potential at a current density of  $-10 \text{ mAcm}^{-2}$  of O-WS<sub>2</sub>/C at acidic and neutral solutions.

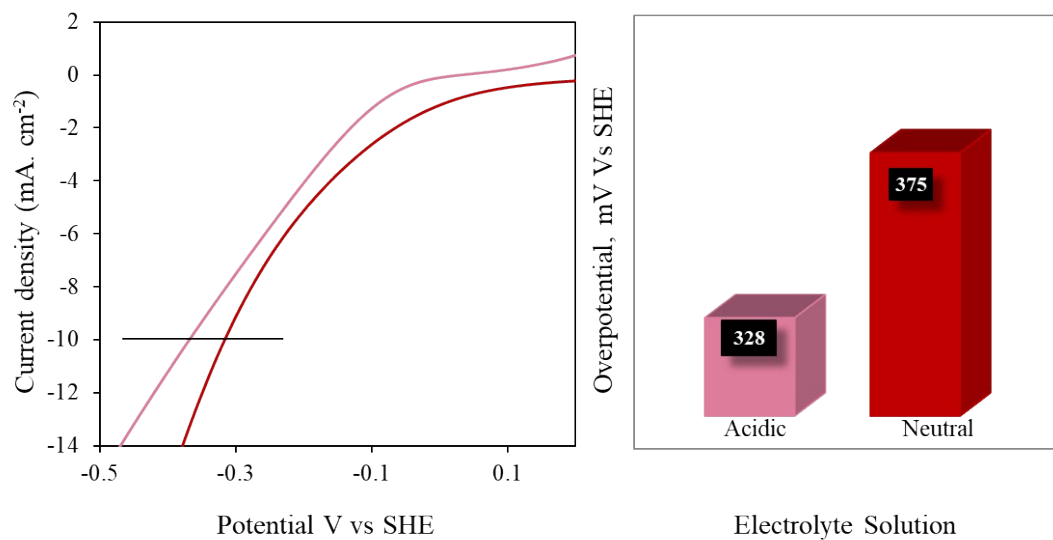

**Figure S13:** Onset potential at a current density of  $-10 \text{ mA cm}^{-2}$  of A-WS<sub>2</sub>/C at acidic and neutral solutions

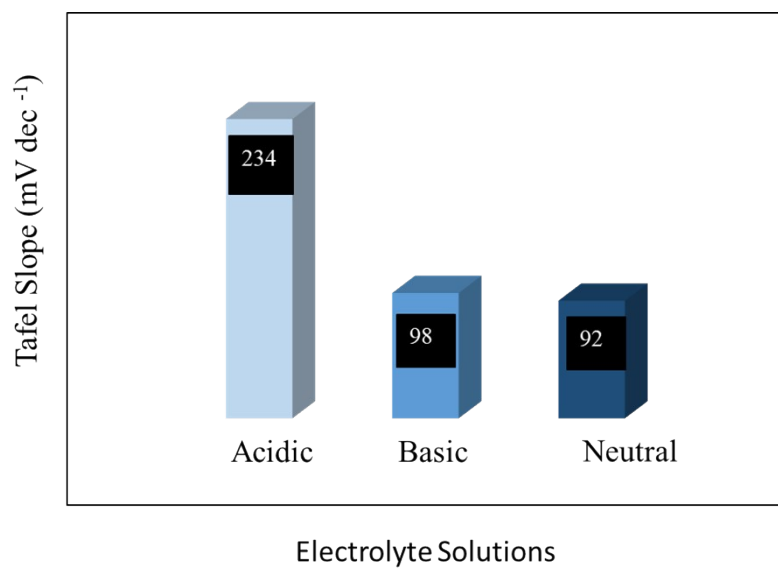

**Figure S14:** Tafel slope in different pH solutions.

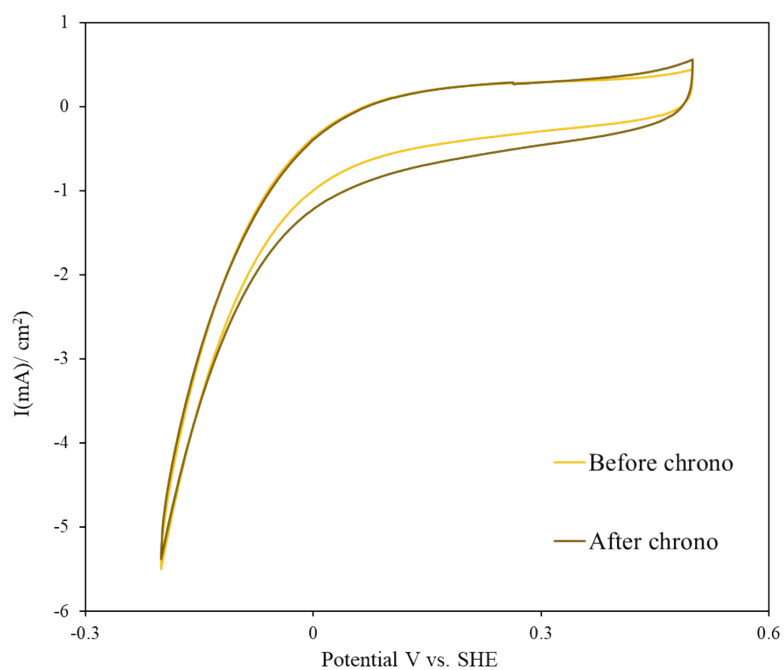

**Figure S15:** CV before and after the 12 h of chronoamperometry test with an applied voltage of -0.150V vs. RHE for the prepared  $\text{WS}_2/\text{C}$  catalyst indicates that the catalyst is stable even after a long duration of hydrogen production.
